# Supplementary material for: Prediction of severe immune-related adverse events requiring hospital admission in patients on immune checkpoint inhibitors: study of a population level insurance claims database from the USA
Source: HighWire-hosted journal article supplement (doi:10.1136/jitc-2020-001935), 2021-03-01
Supplement: jitc-2020-001935supp001_data_supplement.pdf [file jitc-2020-001935supp001_data_supplement.pdf]

**Supplementary Table 1: List of immunosuppressive medications**

Adalimumab  
 Azathioprine  
 Everolimus  
 Infliximab  
 IVIG  
 Jakafi  
 Leflunomide  
 Methotrexate  
 Methylprednisolone  
 Mycophenolate  
 Prednisone  
 Rituximab  
 Sirolimus  
 Tacrolimus  
 Tocilizumab  
 Vedolizumab

**Supplementary Table 2: Outpatient immunosuppressive claims in the 14 days prior to hospitalization**

|                    | Number of outpatient prescriptions | % of all outpatient immunosuppressive prescriptions |
|--------------------|------------------------------------|-----------------------------------------------------|
| Adalimumab         | 1                                  | 0.1%                                                |
| Azathioprine       | 2                                  | 0.3%                                                |
| Everolimus         | 9                                  | 1.2%                                                |
| Infliximab         | 14                                 | 1.8%                                                |
| IVIG               | 4                                  | 0.5%                                                |
| Jakafi             | 2                                  | 0.3%                                                |
| Leflunomide        | 0                                  | 0.0%                                                |
| Methotrexate       | 9                                  | 1.2%                                                |
| Methylprednisolone | 289                                | 37.1%                                               |
| Mycophenolate      | 3                                  | 0.4%                                                |
| Prednisone         | 416                                | 53.3%                                               |
| Rituximab          | 9                                  | 1.2%                                                |
| Sirolimus          | 13                                 | 1.7%                                                |
| Tacrolimus         | 4                                  | 0.5%                                                |
| Tocilizumab        | 1                                  | 0.1%                                                |
| Vedolizumab        | 4                                  | 0.5%                                                |
| Total              | 780                                |                                                     |

**Supplementary Table 3: ICI length of treatment by decile of life**

| Decade of age | n    | Mean ICI Length (Days) | SD ICI Length (Days) |
|---------------|------|------------------------|----------------------|
| 0             | 1    | 24                     | NA                   |
| 10            | 8    | 243.50                 | 290.05               |
| 20            | 102  | 201.96                 | 273.36               |
| 30            | 300  | 191.70                 | 253.91               |
| 40            | 786  | 197.79                 | 269.46               |
| 50            | 2476 | 173.01                 | 234.43               |
| 60            | 4579 | 156.95                 | 213.18               |
| 70            | 4008 | 161.38                 | 215.76               |
| 80            | 1903 | 149.74                 | 199.55               |
| 90            | 215  | 145.29                 | 197.66               |

*Spearman coefficient:  $r=-0.05$*

*$p < 0.001$*

**Supplementary Table 4: Combination ICI treatment by decile of life**

| Decade of age | n    | Patients receiving combination ICI therapy | % patients receiving combination ICI therapy |
|---------------|------|--------------------------------------------|----------------------------------------------|
| 0             | 1    | 0                                          | 0.0%                                         |
| 10            | 8    | 0                                          | 0.0%                                         |
| 20            | 102  | 16                                         | 15.7%                                        |
| 30            | 300  | 45                                         | 15.0%                                        |
| 40            | 786  | 94                                         | 12.0%                                        |
| 50            | 2476 | 255                                        | 10.3%                                        |
| 60            | 4579 | 354                                        | 7.7%                                         |
| 70            | 4008 | 241                                        | 6.0%                                         |
| 80            | 1903 | 55                                         | 2.9%                                         |
| 90            | 215  | 3                                          | 1.4%                                         |
